# Supplementary material for: The roles of CPSF6 in proliferation, apoptosis and tumorigenicity of lung adenocarcinoma
Source: publisher site journal article supplement (doi:10.18632/aging.204407), 2022-11-29
Supplement: Supplementary file [file aging-v14i22-204407-supplementary-material-SD2.pdf]

## SUPPLEMENTARY TABLE

**Supplementary Table 1. Primer sequences for real-time PCR.**

| <b>Gene</b> | <b>Forward primer</b>   | <b>Reverse primer</b>   | <b>Size (bp)</b> |
|-------------|-------------------------|-------------------------|------------------|
| CPSF6       | TGGTGTGGATCTGAAGCATC    | CCCAGACATTTGTCCTGATTGT  | 160              |
| GSK3b       | GCACTGTGTAGCCGTCTG      | GAGGAGGAATAAGGATGGTAGC  | 199              |
| MDM2        | GAATCATCGGACTCAGGTACATC | TCTGTCTCACTAATTGCTCTCCT | 167              |
| IRS1        | ACAAACGCTTCTTCGTACTGC   | AGTCAGCCCGCTTGTTGATG    | 156              |
| JUN         | ATGGTCAGGTTATACTCCTCCTC | CACATGCCACTTGATACAATCC  | 164              |
| ATF2        | GTCATGGTAGCGGATTGGTTA   | CTTTGGGTCTGTGGAGTTGTG   | 124              |
| GAPDH       | TGACTTCAACAGCGACACCCA   | CACCCTGTTGCTGTAGCCAAA   | 121              |
